# Supplementary material for: Delineating toxicity mechanisms associated with MRI contrast enhancement through a multidimensional toxicogenomic profiling of gadolinium
Source: Royal Society of Chemistry journal article supplement (doi:10.1039/d1mo00267h), 2022-01-05
Supplement: d1mo00267h1.xlsx [file d1mo00267h1.xlsx]

## Sheet: Dataset S1
Dataset S1. List of all pooled strains and their log2-fold growth change under different experimental conditions.
ORF	Standard name	IC5 - 10 generations	IC5 - 15 generations	IC10 - 10 generations	IC10 - 15 generations	IC20 - 10 generations	IC20 - 15 generations
YPL057C	SUR1	-7.29974	-7.09127	-7.68139	-6.69988	-7.24134	-6.61348
YJL004C	SYS1	-1.37507	-4.2509	-1.99547	-2.82888	-1.23301	-1.44527
YNL051W	COG5	-1.84234	-4.92367	-3.46486	-5.32591	-1.81606	-2.72021
YPL056C	LCL1	-4.31067	-6.44054	-6.79119	-6.5601	-6.12856	-5.86038
YNL041C	COG6	-3.58564	-6.84411	-2.86654	-3.7408	-2.07029	-1.93563
YJL134W	LCB3		-4.38191	-4.64852	-4.81578	-2.32231	-4.33473
YMR183C	SSO2	-3.42853		-3.72593	-6.34872	-2.97809	-5.6544
YDR136C	VPS61	-5.32577		-2.99274	-4.50126	-3.10679	-3.1296
YML071C	COG8	-2.24524	-2.63587	-2.01773	-2.81956		-1.86557
YBR036C	CSG2		-7.46066	-8.88225	-7.41933	-4.04379
YCR034W	FEN1			-2.29398	-3.43361	-5.46839	-6.53956
YDR389W	SAC7			-3.31792	-3.7063	-2.42393	-4.17092
YDR392W	SPT3			-2.15701	-4.30499	-3.34915	-4.37185
YHR136C	SPL2			-0.983047	-1.50557	-1.20371	-2.24863
YJL135W				-2.46572	-3.54989	-2.7543	-2.92915
YLR025W	SNF7			-2.48492	-2.4683	-5.67904	-4.76809
YLR262C	YPT6			-5.98928	-3.89978	-3.07658	-3.96693
YPL065W	VPS28			-2.14183	-3.4759	-5.23232	-4.06209
YBR164C	ARL1	-2.22744	-5.50512	-2.70812	-5.00761
YCL008C	STP22			-2.56518	-3.60902	-2.40733	-3.54499
YDL052C	SLC1			-3.50061	-5.51609	-3.16794	-5.5042
YDR024W	FYV1			-1.44504	-1.29055	-1.85751	-2.3341
YDR455C				-1.65891	-2.90228	-1.36041	-1.82045
YDR540C	IRC4			-1.68022	-1.74442	-2.16469	-2.27934
YGL046W				-1.3433	-1.42991	-1.38472	-1.72841
YGL226C-A	OST5			0.766904	0.90496	0.654393	0.908572
YIL095W	PRK1			-1.20228	-1.46345	-0.892673	-1.65559
YIL105C	SLM1			-1.56875	-1.96585	-3.56515	-4.27577
YJL020C	BBC1			-1.12707	-1.57603	-0.974154	-1.55833
YJL021C				-0.891174	-1.57158	-1.58827	-1.56412
YJR102C	VPS25			-2.06512	-3.15017	-4.76915	-3.8825
YKR019C	IRS4		-3.32638	-2.90005	-4.53183		-1.59442
YLR171W				0.546207	0.798728	0.709547	0.973637
YLR180W	SAM1			-2.63766	-2.85852	-1.37081	-1.54465
YLR417W	VPS36			-1.40808	-2.6876	-4.63202	-4.27504
YNL229C	URE2			-1.79995	-2.08501	-2.324	-3.29615
YOR061W	CKA2			-1.37682	-1.44193	-2.57823	-2.48827
YOR067C	ALG8	1.6243	1.15858	1.07168	1.34098
YPL002C	SNF8			-1.46125	-2.56177	-3.34822	-4.79089
YPL079W	RPL21B			-1.02463	-2.0748	-1.39915	-2.24472
YMR077C	VPS20			-3.33146	-4.50662	-3.98213	-4.21927
YCR081W	SRB8			-2.52484	-4.77654		-3.16772
YDL023C				-1.61779	-2.51448		-2.05528
YDR049W	VMS1				-1.08964	-1.99326	-3.1485
YDR073W	SNF11			-1.62859	-2.52655		-1.30107
YDR297W	SUR2				-1.42894	-1.20269	-1.75859
YDR486C	VPS60				-1.20478	-1.31896	-1.46945
YER122C	GLO3			-2.03576		-1.91186	-3.90883
YGL045W	RIM8				-1.30923	-1.54389	-2.26695
YGR155W	CYS4			-1.66224	-2.03311	-2.18208
YIL065C	FIS1			-1.49779	-2.55996		-2.85273
YIL077C				-1.27156	-2.22217		-1.66452
YIL124W	AYR1			-1.39548	-1.86529		-1.67443
YJR040W	GEF1			-1.37328		-2.20213	-2.54941
YKR020W	VPS51			-2.8664	-4.27769		-3.87678
YLR055C	SPT8			-2.3638	-4.29866		-2.10184
YLR170C	APS1				0.551792	0.714068	1.00563
YMR154C	RIM13				-0.921457	-1.16735	-1.83224
YOR043W	WHI2			-1.29219	-2.32954		-2.15065
YOR267C	HRK1			-1.21056	-1.49555		-0.906357
YOR275C	RIM20				-1.09735	-1.51219	-2.352
YDR162C	NBP2			-2.3248	-3.88398		-3.53489
YGL005C	COG7		-5.37424	-4.62646	-4.08548
YIL041W	GVP36			-1.72939	-3.61616	-2.19128
YMR010W				-1.15746	-1.53164	-1.08944
YOR030W	DFG16				-1.10794	-1.49994	-1.95368
YPL051W	ARL3		-2.40881	-3.07118	-3.26646
YDR294C	DPL1			-1.98086	-2.309
YER041W	YEN1			-1.01612	-2.39812
YHL003C	LAG1			-1.05953	-1.11562
YBL065W		1.14197				1.02873
YBR044C	TCM62					-1.05555	-1.27289
YBR058C	UBP14					-1.56666	-1.54909
YBR287W				-1.43484	-2.46659
YBR288C	APM3				1.68616		-1.97451
YCL006C						0.794421	0.913316
YDR108W	TRS85			-1.15054	-2.43444
YDR150W	NUM1				-1.09056		-1.70983
YDR218C	SPR28					0.701339	0.901052
YDR256C	CTA1					0.755354	0.9819
YDR272W	GLO2					0.818194	0.883643
YDR284C	DPP1				-1.07539		-1.85519
YDR395W	SXM1			-1.12389	-1.45114
YDR444W				-1.50584	-1.71405
YDR484W	VPS52			-3.89014	-4.88962
YEL028W				-1.01289	-1.19186
YER092W	IES5				-1.0314	-0.847774
YFR011C	AIM13					-1.19755	-1.13069
YFR033C	QCR6					-0.86554	-0.87789
YGR019W	UGA1				-1.00322	0.772361
YGR055W	MUP1				-1.03144	-0.837456
YGR072W	UPF3			-0.841866	-1.16997
YGR089W	NNF2			-0.858452	-1.3543
YGR193C	PDX1			0.931068		0.918513
YGR196C	FYV8			0.794751			0.91928
YGR261C	APL6			1.17779	1.66349
YGR270W	YTA7					-1.70293	-2.25321
YHR198C	AIM18			0.876102	0.806334
YHR203C	RPS4B			-2.00117		-1.75775
YIL002C	INP51			-1.18386	-1.11481
YIL069C	RPS24B			-1.41195	-1.69622
YIL098C	FMC1			-1.76535	-2.10019
YJL139C	YUR1			0.945699	1.3928
YJL164C	TPK1					-1.16645	-1.02999
YJL175W				-2.28078	-2.89967
YJR066W	TOR1					0.957004	1.06281
YKL190W	CNB1			-1.12578	-1.69411
YKL213C	DOA1				-3.14151		-1.70035
YLR020C	YEH2				-1.59338		-1.4824
YLR119W	SRN2					-1.50244	-1.66439
YLR382C	NAM2					-2.77809	-2.99098
YLR388W	RPS29A			-3.78177		-2.29974
YLR460C						-1.03399	-1.33248
YML021C	UNG1					1.03826	1.01908
YMR214W	SCJ1			1.0482		0.733419
YMR223W	UBP8			-0.950544	-0.854199
YMR304W	UBP15					0.914748	1.25566
YNL294C	RIM21					-1.13399	-1.62658
YNR049C	MSO1			-2.37332	-2.64083
YOL004W	SIN3			-1.5338			-2.26988
YOL018C	TLG2			-1.46814	-3.38915
YOL084W	PHM7			1.60864		1.4737
YOR068C	VAM10			-1.17752	-0.961718
YOR070C	GYP1			-1.00665	-1.74635
YOR237W	HES1					-0.987701	-1.06048
YPL047W	SGF11			-1.98029	-2.92083
YPL120W	VPS30			-0.845485	-1.00571
YPL191C				0.669473	0.630449
YPR064W				-1.23192	-1.21597
YPR087W	VPS69			-2.38486	-3.12527
YPR096C						0.855899	0.800214
YPR149W	NCE102			-1.29608	-1.79599
YAL026C	DRS2			-3.42351	-2.61379
YAL058W	CNE1			0.961035	1.7214
YBL049W	MOH1			2.20071		2.04638
YBR168W	PEX32			-3.18238	-4.45645
YDR018C				0.880863	0.900315
YDR083W	RRP8			-3.53436		-3.63299
YGR063C	SPT4				-4.81152	-4.0502
YHR094C	HXT1					0.832779	1.06787
YHR108W	GGA2					-1.04035	-2.25789
YIL017C	VID28				-2.50644		-2.17801
YIL064W	SEE1			-0.713774	-0.965406
YIL157C	COA1			1.60261		1.80896
YJR074W	MOG1			-2.30508	-4.53169
YLR169W						0.91322	1.47439
YLR261C	VPS63			-3.61455		-3.26892
YLR350W	ORM2			-1.95957	-1.64043
YML026C	RPS18B			-2.46059	-3.20184
YML073C	RPL6A			-5.41901		-3.99744
YML115C	VAN1			-3.99372	-3.39614
YML128C	MSC1			-1.91119	-2.65328
YMR004W	MVP1			-1.12623	-1.33285
YMR121C	RPL15B					-2.27527	-2.80672
YMR262W						3.05566	4.00402
YNL224C	SQS1				-1.00967		-0.908653
YOR112W	CEX1					0.668255	0.881768
YOR182C	RPS30B			-3.9753	-4.83404
YOR277C				1.97266		2.12924
YPL090C	RPS6A			-3.82411		-2.47494
YPL232W	SSO1			-1.34891	-1.73503
YPR079W	MRL1			-1.40273	-1.01174
YER005W	YND1			0.874393
YIL110W	HPM1			-2.97764
YAL058C-A					1.59761
YBR025C	OLA1				-0.955977
YBR047W	FMP23					0.679911
YBR048W	RPS11B			-2.77066
YBR065C	ECM2				0.827947
YBR071W				0.879744
YBR084C-A	RPL19A				-3.09152
YBR125C	PTC4				-0.853351
YBR149W	ARA1			0.746896
YBR158W	AMN1			1.2171
YBR161W	CSH1					0.662673
YBR185C	MBA1					0.959231
YBR259W					-1.84136
YCL001W-A					-1.9977
YCL022C						1.10768
YCR006C						1.11742
YCR007C						0.963322
YCR026C	NPP1						-0.991985
YDL002C	NHP10				-1.60013
YDL010W	GRX6					1.66477
YDL019C	OSH2			-1.06664
YDL033C	SLM3					-1.80677
YDL127W	PCL2					1.18662
YDL186W						0.868151
YDR067C	OCA6				-0.904465
YDR100W	TVP15					1.15874
YDR192C	NUP42						0.946368
YDR204W	COQ4					0.853153
YDR206W	EBS1				-1.29699
YDR230W						1.23365
YDR239C							1.15092
YDR249C				0.689807
YDR274C						-0.68572
YDR276C	PMP3		0.876809
YDR310C	SUM1						-1.48993
YDR332W	IRC3						1.05146
YDR351W	SBE2						0.429856
YDR474C						-0.859034
YDR500C	RPL37B				-2.47494
YDR515W	SLF1				-0.892088
YEL037C	RAD23				-0.846466
YEL043W							-1.32056
YER046W	SPO73						-2.03146
YER063W	THO1			1.23799
YER088C	DOT6					0.774146
YER120W	SCS2	1.81681
YER130C							-1.02285
YER145C	FTR1					-0.778118
YER166W	DNF1					0.813961
YFL018C	LPD1						-3.55772
YFL020C	PAU5					-0.856873
YFL034W				0.779479
YFR035C					-1.1465
YGL071W	AFT1					1.50004
YGL096W	TOS8				0.809469
YGL177W							1.26023
YGL199C					-0.757073
YGL203C	KEX1					-1.18436
YGL212W	VAM7						-1.80982
YGL220W	FRA2				0.729103
YGL228W	SHE10			0.730373
YGL250W	RMR1				-1.24205
YGL252C	RTG2						-1.03621
YGL253W	HXK2					0.725907
YGR004W	PEX31						0.919124
YGR021W						0.914039
YGR050C				-1.04146
YGR071C	ENV11				-1.35659
YHL027W	RIM101						-2.19068
YHL043W	ECM34					1.19429
YHR079C-B					-1.3207
YHR086W	NAM8						1.12485
YHR104W	GRE3				0.99651
YHR113W	APE4			0.73711
YHR125W						1.26627
YHR139C-A						0.775332
YHR152W	SPO12				0.932329
YHR209W	CRG1					0.974881
YIL001W					-0.823896
YIL006W	YIA6				-0.98617
YIL025C						-1.29094
YIL056W	VHR1					0.702584
YIL060W						-2.23574
YIL102C						0.904152
YIL123W	SIM1						0.900024
YIL130W	ASG1					-1.66101
YIL149C	MLP2					0.569257
YIL161W							-1.06506
YIL166C						0.680464
YIL167W						0.706279
YIR003W	AIM21						-0.94068
YJL024C	APS3				1.80331
YJL036W	SNX4						-1.32959
YJL142C	IRC9			0.819016
YJL165C	HAL5			1.91363
YJR091C	JSN1				0.624095
YJR097W	JJJ3			-1.61895
YKL023W					-0.987891
YKL032C	IXR1				-3.46873
YKL041W	VPS24				-1.72044
YKL046C	DCW1						-1.40035
YKL167C	MRP49					0.998537
YKR035C	OPI8				-1.52129
YKR035W-A	DID2				-0.692456
YKR064W	OAF3						-1.2085
YKR070W							0.861122
YKR096W	ESL2				-1.11094
YLL042C	ATG10					0.72136
YLR136C	TIS11						0.883243
YLR146C	SPE4				-1.22844
YLR172C	DPH5				-2.37715
YLR181C	VTA1						-1.37647
YLR204W	QRI5				-1.6062
YLR266C	PDR8				-1.68624
YLR267W	BOP2						1.05532
YLR279W						1.15409
YLR282C							-3.82135
YLR288C	MEC3						-3.29286
YLR299W	ECM38			-0.961636
YLR309C	IMH1			-0.711403
YLR349W					0.718077
YLR360W	VPS38				-1.56567
YLR361C	DCR2				-0.885014
YLR374C							-1.97695
YLR381W	CTF3			-1.12213
YLR410W	VIP1				-1.55923
YLR443W	ECM7				-1.35309
YML009C	MRPL39				-2.31882
YML047C	PRM6				-3.64272
YMR084W		1.387
YMR109W	MYO5						-0.941901
YMR141C				1.11153
YMR158W	MRPS8				0.700471
YMR244W				0.607246
YMR315W							-1.29866
YNL013C					-0.614033
YNL027W	CRZ1				-0.630856
YNL148C	ALF1			-1.86816
YNL217W					0.809122
YNL219C	ALG9			0.967394
YNL286W	CUS2				-1.73886
YNL314W	DAL82				0.548255
YNR021W							0.886667
YNR051C	BRE5				-2.79979
YOL006C	TOP1						-2.22122
YOL062C	APM4				-0.863201
YOL121C	RPS19A			-2.36438
YOR002W	ALG6				1.13101
YOR039W	CKB2				-1.18565
YOR045W	TOM6					1.08708
YOR051C	ETT1						-1.59442
YOR054C	VHS3					1.04145
YOR065W	CYT1					-2.72219
YOR069W	VPS5				-1.07116
YOR085W	OST3	2.08246
YOR089C	VPS21				-2.00507
YOR123C	LEO1						-2.006
YOR132W	VPS17			-1.24167
YOR135C	IRC14				-1.32643
YOR172W	YRM1					0.637638
YOR175C	ALE1				0.735657
YOR177C	MPC54					1.12788
YOR208W	PTP2						-1.49006
YOR216C	RUD3						-1.40947
YOR298C-A	MBF1				-1.36212
YOR330C	MIP1				0.996092
YPL080C				-1.52425
YPL154C	PEP4				-0.96076
YPL207W	TYW1			1.19861
YPR061C	JID1						-0.95846
YPR098C						1.07663
YAL008W	FUN14						-3.67888
YAL030W	SNC1			-0.85903
YAR031W	PRM9				0.595286
YBL010C					0.77755
YBL013W	FMT1					2.08217
YBL061C	SKT5			2.19693
YBL104C	SEA4			2.39701
YBR027C						0.983352
YBR037C	SCO1			2.55718
YCL024W	KCC4			1.23397
YCR071C	IMG2						-3.18739
YCR094W	CDC50			-3.16909
YCR099C						1.43122
YDL006W	PTC1				-4.88917
YDL081C	RPP1A					-3.06196
YDL094C							-2.31273
YDL192W	ARF1					-3.6968
YDR048C					-4.9938
YDR074W	TPS2			-4.76579
YDR122W	KIN1					1.67059
YDR266C	HEL2						-1.42095
YDR304C	CPR5			1.58213
YDR456W	NHX1				-3.08053
YER074W	RPS24A			-3.70631
YER151C	UBP3			-1.6363
YFL056C	AAD6				-2.25886
YFR022W	ROG3					1.75542
YGL063W	PUS2					1.51518
YGL088W						-2.27328
YGL095C	VPS45			-4.63849
YGL124C	MON1				-3.02778
YGL200C	EMP24			1.97919
YGR041W	BUD9					0.764469
YGR066C				2.51986
YGR076C	MRPL25					1.47637
YGR118W	RPS23A				-2.51414
YGR122W						-4.62642
YGR157W	CHO2					1.31875
YGR165W	MRPS35			1.27806
YGR174C	CBP4				0.9193
YGR177C	ATF2					0.864812
YGR197C	SNG1			2.09655
YGR202C	PCT1			-1.92393
YGR214W	RPS0A				-3.40727
YGR215W	RSM27					-3.53825
YGR259C					-0.894985
YHL007C	STE20					-1.60628
YHR012W	VPS29					1.81692
YHR029C	YHI9					1.33596
YIL050W	PCL7				-0.576238
YIL076W	SEC28				-1.11589
YIL087C	AIM19						-0.859313
YIL133C	RPL16A						-3.06477
YJL204C	RCY1				-3.67122
YJR039W						0.665031
YKL001C	MET14				-1.02258
YKL002W	DID4				-3.03827
YKL115C					-2.45794
YLL018C-A	COX19					1.75781
YLR032W	RAD5					-2.26012
YLR039C	RIC1			-5.0347
YLR058C	SHM2			1.02669
YLR081W	GAL2				-1.80567
YLR200W	YKE2			-3.31251
YLR252W							-2.97687
YLR268W	SEC22						-3.46294
YLR324W	PEX30					1.78705
YLR326W						1.71299
YLR335W	NUP2			2.4691
YLR407W					-2.37274
YLR441C	RPS1A					-3.7967
YML005W	TRM12			0.82226
YML024W	RPS17A			-2.03188
YML035C-A						0.942908
YMR006C	PLB2					0.649211
YMR029C	FAR8				1.18781
YMR119W-A						1.18501
YMR161W	HLJ1						0.852566
YMR244C-A	COA6					3.30573
YMR261C	TPS3			0.696361
YMR269W	TMA23			-4.02511
YMR289W	ABZ2					2.86485
YNL001W	DOM34				-2.98281
YNL022C	RCM1					0.592202
YNL101W	AVT4					2.26243
YNL116W	DMA2				-1.13902
YNL136W	EAF7				-1.82095
YNL230C	ELA1						-0.978371
YNL284C	MRPL10					-4.43381
YOL118C						1.23768
YOL160W						0.676653
YOR091W	TMA46				-1.09703
YOR173W	DCS2						-1.30855
YOR230W	WTM1					2.53938
YOR386W	PHR1					2.46525
YPL161C	BEM4				-4.58443
YPL206C	PGC1					1.71529
YPR070W	MED1			-2.05713
YPR100W	MRPL51				1.09478
YPR116W	RRG8					-3.19875
YJL157C	FAR1
YAL024C	LTE1
YAL054C	ACS1
YAL064C-A	TDA8
YAR002C-A	ERP1
YAR050W	FLO1
YBL001C	ECM15
YBL002W	HTB2
YBL003C	HTA2
YBL015W	ACH1
YBL017C	PEP1
YBL019W	APN2
YBL024W	NCL1
YBL028C
YBL029W
YBL031W	SHE1
YBL032W	HEK2
YBL037W	APL3
YBL044W
YBL046W	PSY4
YBL059W
YBL064C	PRX1
YBL066C	SEF1
YBL067C	UBP13
YBL068W	PRS4
YBL069W	AST1
YBL070C
YBL071C
YBL078C	ATG8
YBL081W
YBL086C
YBL088C	TEL1
YBL089W	AVT5
YBL091C	MAP2
YBL091C-A	SCS22
YBL095W
YBL100C
YBL106C	SRO77
YBL107C	MIC23
YBR001C	NTH2
YBR005W	RCR1
YBR006W	UGA2
YBR007C	DSF2
YBR008C	FLR1
YBR009C	HHF1
YBR010W	HHT1
YBR012C
YBR013C
YBR014C	GRX7
YBR016W
YBR018C	GAL7
YBR019C	GAL10
YBR022W	POA1
YBR023C	CHS3
YBR028C	YPK3
YBR031W	RPL4A
YBR033W	EDS1
YBR035C	PDX3
YBR040W	FIG1
YBR043C	QDR3
YBR045C	GIP1
YBR050C	REG2
YBR051W
YBR052C	RFS1
YBR054W	YRO2
YBR059C	AKL1
YBR062C
YBR063C
YBR064W
YBR066C	NRG2
YBR067C	TIP1
YBR068C	BAP2
YBR069C	TAT1
YBR072W	HSP26
YBR073W	RDH54
YBR076W	ECM8
YBR083W	TEC1
YBR084W	MIS1
YBR090C
YBR092C	PHO3
YBR093C	PHO5
YBR094W	PBY1
YBR099C
YBR100W
YBR103W	SIF2
YBR104W	YMC2
YBR105C	VID24
YBR107C	IML3
YBR108W	AIM3
YBR113W
YBR114W	RAD16
YBR116C
YBR119W	MUD1
YBR128C	ATG14
YBR130C	SHE3
YBR131W	CCZ1
YBR134W
YBR137W
YBR138C
YBR139W
YBR141C	BMT2
YBR144C
YBR145W	ADH5
YBR147W	RTC2
YBR148W	YSW1
YBR150C	TBS1
YBR151W	APD1
YBR156C	SLI15
YBR157C	ICS2
YBR159W	IFA38
YBR162C	TOS1
YBR169C	SSE2
YBR172C	SMY2
YBR176W	ECM31
YBR178W
YBR180W	DTR1
YBR183W	YPC1
YBR184W
YBR186W	PCH2
YBR187W	GDT1
YBR188C	NTC20
YBR195C	MSI1
YBR197C
YBR199W	KTR4
YBR201W	DER1
YBR203W	COS111
YBR205W	KTR3
YBR206W
YBR208C	DUR1,2
YBR210W	ERV15
YBR212W	NGR1
YBR213W	MET8
YBR214W	SDS24
YBR215W	HPC2
YBR216C	YBP1
YBR217W	ATG12
YBR218C	PYC2
YBR219C
YBR220C
YBR221C	PDB1
YBR222C	PCS60
YBR223C	TDP1
YBR224W
YBR225W
YBR226C
YBR227C	MCX1
YBR228W	SLX1
YBR229C	ROT2
YBR230C	OM14
YBR231C	SWC5
YBR232C
YBR233W	PBP2
YBR238C
YBR240C	THI2
YBR241C
YBR242W
YBR245C	ISW1
YBR246W	RRT2
YBR248C	HIS7
YBR249C	ARO4
YBR250W	SPO23
YBR255W	MTC4
YBR260C	RGD1
YBR261C	TAE1
YBR263W	SHM1
YBR269C	FMP21
YBR270C	BIT2
YBR272C	HSM3
YBR273C	UBX7
YBR275C	RIF1
YBR276C	PPS1
YBR278W	DPB3
YBR281C	DUG2
YBR284W
YBR285W
YBR286W	APE3
YBR290W	BSD2
YBR294W	SUL1
YBR297W	MAL33
YBR298C	MAL31
YBR299W	MAL32
YBR300C
YBR301W	PAU24
YCL009C	ILV6
YCL010C	SGF29
YCL012W
YCL013W
YCL014W	BUD3
YCL026C
YCL027W	FUS1
YCL030C	HIS4
YCL032W	STE50
YCL033C	MXR2
YCL035C	GRX1
YCL036W	GFD2
YCL037C	SRO9
YCL039W	GID7
YCL040W	GLK1
YCL042W
YCL044C	MGR1
YCL045C	EMC1
YCL047C	POF1
YCL048W	SPS22
YCL049C
YCL050C	APA1
YCL051W	LRE1
YCL055W	KAR4
YCL056C	PEX34
YCL057W	PRD1
YCL060C
YCL062W
YCL063W	VAC17
YCL064C	CHA1
YCL069W	VBA3
YCL075W
YCL076W
YCR008W	SAT4
YCR010C	ADY2
YCR011C	ADP1
YCR015C
YCR016W
YCR019W	MAK32
YCR020C	PET18
YCR020C-A	MAK31
YCR022C
YCR024C	SLM5
YCR025C
YCR028C-A	RIM1
YCR030C	SYP1
YCR031C	RPS14A
YCR032W	BPH1
YCR033W	SNT1
YCR037C	PHO87
YCR043C
YCR045C	RRT12
YCR048W	ARE1
YCR049C
YCR060W	TAH1
YCR061W
YCR062W
YCR067C	SED4
YCR068W	ATG15
YCR069W	CPR4
YCR073W-A	SOL2
YCR075C	ERS1
YCR076C	FUB1
YCR079W	PTC6
YCR083W	TRX3
YCR085W
YCR087C-A
YCR087W
YCR088W	ABP1
YCR089W	FIG2
YCR092C	MSH3
YCR100C
YCR101C
YCR102W-A
YCR105W	ADH7
YCR106W	RDS1
YCR107W	AAD3
YDL012C
YDL018C	ERP3
YDL021W	GPM2
YDL022W	GPD1
YDL026W
YDL027C
YDL032W
YDL034W
YDL035C	GPR1
YDL036C	PUS9
YDL037C	BSC1
YDL038C
YDL039C	PRM7
YDL046W	NPC2
YDL048C	STP4
YDL049C	KNH1
YDL050C
YDL051W	LHP1
YDL053C	PBP4
YDL054C	MCH1
YDL059C	RAD59
YDL061C	RPS29B
YDL062W
YDL063C	SYO1
YDL065C	PEX19
YDL067C	COX9
YDL069C	CBS1
YDL070W	BDF2
YDL071C
YDL072C	YET3
YDL073W
YDL075W	RPL31A
YDL078C	MDH3
YDL079C	MRK1
YDL080C	THI3
YDL082W	RPL13A
YDL085W	NDE2
YDL086W
YDL089W	NUR1
YDL091C	UBX3
YDL096C	OPI6
YDL099W	BUG1
YDL100C	GET3
YDL109C
YDL110C	TMA17
YDL112W	TRM3
YDL113C	ATG20
YDL114W
YDL117W	CYK3
YDL118W
YDL121C
YDL124W
YDL125C	HNT1
YDL128W	VCX1
YDL130W-A	STF1
YDL131W	LYS21
YDL133C-A	RPL41B
YDL134C	PPH21
YDL134C-A
YDL135C	RDI1
YDL136W	RPL35B
YDL137W	ARF2
YDL138W	RGT2
YDL142C	CRD1
YDL144C
YDL149W	ATG9
YDL154W	MSH5
YDL155W	CLB3
YDL156W	CMR1
YDL157C
YDL161W	ENT1
YDL167C	NRP1
YDL170W	UGA3
YDL171C	GLT1
YDL172C
YDL174C	DLD1
YDL176W
YDL177C
YDL178W	DLD2
YDL179W	PCL9
YDL180W
YDL182W	LYS20
YDL184C	RPL41A
YDL187C
YDL188C	PPH22
YDL190C	UFD2
YDL197C	ASF2
YDL199C
YDL200C	MGT1
YDL201W	TRM8
YDL203C	ACK1
YDL204W	RTN2
YDL206W
YDL210W	UGA4
YDL211C
YDL214C	PRR2
YDL215C	GDH2
YDL216C	RRI1
YDL218W
YDL219W	DTD1
YDL222C	FMP45
YDL224C	WHI4
YDL225W	SHS1
YDL226C	GCS1
YDL229W	SSB1
YDL231C	BRE4
YDL233W	MFG1
YDL236W	PHO13
YDL237W	AIM6
YDL238C	GUD1
YDL239C	ADY3
YDL240W	LRG1
YDL242W
YDR001C	NTH1
YDR003W	RCR2
YDR004W	RAD57
YDR005C	MAF1
YDR007W	TRP1
YDR010C
YDR011W	SNQ2
YDR014W	RAD61
YDR019C	GCV1
YDR020C	DAS2
YDR022C	ATG31
YDR026C	NSI1
YDR029W
YDR030C	RAD28
YDR031W	MIC14
YDR032C	PST2
YDR034C	LYS14
YDR035W	ARO3
YDR036C	EHD3
YDR042C
YDR046C	BAP3
YDR051C	DET1
YDR055W	PST1
YDR056C
YDR061W
YDR063W	AIM7
YDR068W	DOS2
YDR070C	FMP16
YDR071C	PAA1
YDR072C	IPT1
YDR075W	PPH3
YDR077W	SED1
YDR078C	SHU2
YDR079W	PET100
YDR084C	TVP23
YDR085C	AFR1
YDR092W	UBC13
YDR093W	DNF2
YDR094W
YDR095C
YDR096W	GIS1
YDR097C	MSH6
YDR098C	GRX3
YDR102C
YDR104C	SPO71
YDR105C	TMS1
YDR107C	TMN2
YDR109C
YDR110W	FOB1
YDR112W	IRC2
YDR115W
YDR116C	MRPL1
YDR117C	TMA64
YDR121W	DPB4
YDR123C	INO2
YDR124W
YDR125C	ECM18
YDR128W	MTC5
YDR130C	FIN1
YDR132C
YDR133C
YDR134C
YDR135C	YCF1
YDR139C	RUB1
YDR142C	PEX7
YDR144C	MKC7
YDR146C	SWI5
YDR148C	KGD2
YDR149C
YDR152W	GIR2
YDR154C
YDR163W	CWC15
YDR165W	TRM82
YDR169C	STB3
YDR171W	HSP42
YDR178W	SDH4
YDR179C	CSN9
YDR179W-A
YDR181C	SAS4
YDR183W	PLP1
YDR185C	UPS3
YDR186C
YDR191W	HST4
YDR193W
YDR198C	RKM2
YDR202C	RAV2
YDR203W
YDR205W	MSC2
YDR209C
YDR214W	AHA1
YDR215C
YDR216W	ADR1
YDR217C	RAD9
YDR219C	MFB1
YDR220C
YDR221W	GTB1
YDR222W
YDR223W	CRF1
YDR225W	HTA1
YDR229W	IVY1
YDR231C	COX20
YDR233C	RTN1
YDR237W	MRPL7
YDR242W	AMD2
YDR244W	PEX5
YDR247W	VHS1
YDR248C
YDR250C
YDR252W	BTT1
YDR253C	MET32
YDR254W	CHL4
YDR255C	RMD5
YDR257C	RKM4
YDR258C	HSP78
YDR259C	YAP6
YDR260C	SWM1
YDR261C	EXG2
YDR262W
YDR263C	DIN7
YDR265W	PEX10
YDR269C
YDR270W	CCC2
YDR271C
YDR273W	DON1
YDR275W	BSC2
YDR277C	MTH1
YDR278C
YDR279W	RNH202
YDR282C
YDR285W	ZIP1
YDR286C
YDR287W	INM2
YDR289C	RTT103
YDR291W	HRQ1
YDR295C	HDA2
YDR305C	HNT2
YDR306C
YDR307W	PMT7
YDR309C	GIC2
YDR312W	SSF2
YDR313C	PIB1
YDR314C	RAD34
YDR316W	OMS1
YDR319C	YFT2
YDR321W	ASP1
YDR326C	YSP2
YDR329C	PEX3
YDR330W	UBX5
YDR333C	RQC1
YDR334W	SWR1
YDR337W	MRPS28
YDR338C
YDR345C	HXT3
YDR346C	SVF1
YDR348C	PAL1
YDR349C	YPS7
YDR352W	YPQ2
YDR357C	CNL1
YDR358W	GGA1
YDR360W	OPI7
YDR363W	ESC2
YDR368W	YPR1
YDR370C	DXO1
YDR371W	CTS2
YDR372C	VPS74
YDR374C
YDR377W	ATP17
YDR379W	RGA2
YDR380W	ARO10
YDR383C	NKP1
YDR386W	MUS81
YDR387C
YDR391C
YDR393W	SHE9
YDR399W	HPT1
YDR400W	URH1
YDR403W	DIT1
YDR405W	MRP20
YDR411C	DFM1
YDR414C	ERD1
YDR415C
YDR419W	RAD30
YDR420W	HKR1
YDR421W	ARO80
YDR425W	SNX41
YDR426C
YDR428C	BNA7
YDR430C	CYM1
YDR431W
YDR436W	PPZ2
YDR438W	THI74
YDR439W	LRS4
YDR441C	APT2
YDR443C	SSN2
YDR445C
YDR446W	ECM11
YDR447C	RPS17B
YDR451C	YHP1
YDR453C	TSA2
YDR457W	TOM1
YDR459C	PFA5
YDR462W	MRPL28
YDR463W	STP1
YDR465C	RMT2
YDR466W	PKH3
YDR471W	RPL27B
YDR476C
YDR479C	PEX29
YDR480W	DIG2
YDR481C	PHO8
YDR482C	CWC21
YDR483W	KRE2
YDR485C	VPS72
YDR492W	IZH1
YDR493W	MZM1
YDR497C	ITR1
YDR502C	SAM2
YDR503C	LPP1
YDR504C	SPG3
YDR505C	PSP1
YDR511W	ACN9
YDR513W	GRX2
YDR514C
YDR516C	EMI2
YDR519W	FPR2
YDR520C	URC2
YDR521W
YDR522C	SPS2
YDR524C	AGE1
YDR525W-A	SNA2
YDR530C	APA2
YDR534C	FIT1
YDR535C
YDR536W	STL1
YDR538W	PAD1
YDR539W	FDC1
YEL001C	IRC22
YEL003W	GIM4
YEL008W
YEL010W
YEL011W	GLC3
YEL013W	VAC8
YEL014C
YEL015W	EDC3
YEL016C	NPP2
YEL017C-A	PMP2
YEL017W	GTT3
YEL018W	EAF5
YEL020C
YEL023C
YEL025C
YEL030W	ECM10
YEL038W	UTR4
YEL039C	CYC7
YEL041W	YEF1
YEL045C
YEL047C	FRD1
YEL050C	RML2
YEL053C	MAK10
YEL054C	RPL12A
YEL056W	HAT2
YEL057C
YEL059W	HHY1
YEL061C	CIN8
YEL062W	NPR2
YEL063C	CAN1
YEL064C	AVT2
YEL065W	SIT1
YEL066W	HPA3
YEL067C
YEL068C
YEL071W	DLD3
YER001W	MNN1
YER007C-A	TMA20
YER007W	PAC2
YER012W	PRE1
YER017C	AFG3
YER019C-A	SBH2
YER020W	GPA2
YER024W	YAT2
YER027C	GAL83
YER028C	MIG3
YER031C	YPT31
YER032W	FIR1
YER033C	ZRG8
YER034W
YER037W	PHM8
YER038W-A
YER039C	HVG1
YER039C-A
YER042W	MXR1
YER044C-A	MEI4
YER045C	ACA1
YER046W-A
YER047C	SAP1
YER048C	CAJ1
YER049W	TPA1
YER050C	RSM18
YER051W	JHD1
YER053C	PIC2
YER055C	HIS1
YER056C	FCY2
YER056C-A	RPL34A
YER057C	HMF1
YER059W	PCL6
YER060W	FCY21
YER064C	VHR2
YER065C	ICL1
YER066C-A
YER066W	RRT13
YER067C-A
YER071C	TDA2
YER072W	VTC1
YER073W	ALD5
YER075C	PTP3
YER079W
YER080W	AIM9
YER081W	SER3
YER084W
YER085C
YER087C-A
YER087W	AIM10
YER089C	PTC2
YER091C-A
YER093C-A	AIM11
YER096W	SHC1
YER097W
YER098W	UBP9
YER108C
YER113C	TMN3
YER114C	BOI2
YER121W
YER124C	DSE1
YER128W	VFA1
YER129W	SAK1
YER131W	RPS26B
YER132C	PMD1
YER134C
YER139C	RTR1
YER140W	EMP65
YER143W	DDI1
YER144C	UBP5
YER149C	PEA2
YER150W	SPI1
YER153C	PET122
YER154W	OXA1
YER158C
YER162C	RAD4
YER163C	GCG1
YER164W	CHD1
YER167W	BCK2
YER169W	RPH1
YER170W	ADK2
YER173W	RAD24
YER174C	GRX4
YER175C	TMT1
YER180C	ISC10
YER181C
YER182W	FMP10
YER183C	FAU1
YER185W	PUG1
YER187W
YER188W
YFL003C	MSH4
YFL004W	VTC2
YFL007W	BLM10
YFL010C	WWM1
YFL010W-A	AUA1
YFL012W
YFL013C	IES1
YFL013W-A
YFL014W	HSP12
YFL015C
YFL016C	MDJ1
YFL019C
YFL021W	GAT1
YFL023W	BUD27
YFL025C	BST1
YFL027C	GYP8
YFL028C	CAF16
YFL030W	AGX1
YFL031W	HAC1
YFL032W
YFL033C	RIM15
YFL034C-A	RPL22B
YFL041W	FET5
YFL042C
YFL043C
YFL044C	OTU1
YFL046W	FMP32
YFL047W	RGD2
YFL048C	EMP47
YFL049W	SWP82
YFL050C	ALR2
YFL051C
YFL052W
YFL053W	DAK2
YFL063W
YFR006W
YFR007W	YFH7
YFR008W	FAR7
YFR009W	GCN20
YFR012W	DCV1
YFR013W	IOC3
YFR014C	CMK1
YFR015C	GSY1
YFR016C
YFR017C	IGD1
YFR021W	ATG18
YFR023W	PES4
YFR024C
YFR024C-A	LSB3
YFR025C	HIS2
YFR026C	ULI1
YFR032C	RRT5
YFR032C-A	RPL29
YFR036W	CDC26
YFR039C	OSW7
YFR040W	SAP155
YFR041C	ERJ5
YFR043C	IRC6
YFR044C	DUG1
YFR045W
YFR046C	CNN1
YFR047C	BNA6
YFR049W	YMR31
YFR053C	HXK1
YFR054C
YFR055W	IRC7
YFR056C
YFR057W
YGL003C	CDH1
YGL004C	RPN14
YGL006W	PMC1
YGL010W
YGL015C
YGL016W	KAP122
YGL017W	ATE1
YGL021W	ALK1
YGL023C	PIB2
YGL028C	SCW11
YGL030W	RPL30
YGL033W	HOP2
YGL035C	MIG1
YGL037C	PNC1
YGL039W
YGL041C
YGL049C	TIF4632
YGL050W	TYW3
YGL051W	MST27
YGL053W	PRM8
YGL054C	ERV14
YGL056C	SDS23
YGL057C	GEP7
YGL059W	PKP2
YGL060W	YBP2
YGL067W	NPY1
YGL077C	HNM1
YGL079W	KXD1
YGL080W	FMP37
YGL081W
YGL082W
YGL083W	SCY1
YGL085W	LCL3
YGL086W	MAD1
YGL089C	MF(ALPHA)2
YGL094C	PAN2
YGL109W
YGL110C	CUE3
YGL114W
YGL117W
YGL118C
YGL121C	GPG1
YGL126W	SCS3
YGL129C	RSM23
YGL131C	SNT2
YGL132W
YGL133W	ITC1
YGL136C	MRM2
YGL138C
YGL139W	FLC3
YGL140C
YGL141W	HUL5
YGL143C	MRF1
YGL144C	ROG1
YGL148W	ARO2
YGL149W
YGL152C
YGL153W	PEX14
YGL154C	LYS5
YGL156W	AMS1
YGL159W
YGL161C	YIP5
YGL162W	SUT1
YGL164C	YRB30
YGL165C
YGL166W	CUP2
YGL170C	SPO74
YGL175C	SAE2
YGL180W	ATG1
YGL181W	GTS1
YGL194C	HOS2
YGL195W	GCN1
YGL196W	DSD1
YGL197W	MDS3
YGL198W	YIP4
YGL205W	POX1
YGL208W	SIP2
YGL209W	MIG2
YGL210W	YPT32
YGL213C	SKI8
YGL214W
YGL215W	CLG1
YGL217C
YGL221C	NIF3
YGL222C	EDC1
YGL224C	SDT1
YGL227W	VID30
YGL229C	SAP4
YGL230C
YGL231C	EMC4
YGL232W	TAN1
YGL241W	KAP114
YGL242C
YGL248W	PDE1
YGL249W	ZIP2
YGL254W	FZF1
YGL255W	ZRT1
YGL256W	ADH4
YGL257C	MNT2
YGL258W	VEL1
YGL259W	YPS5
YGL260W
YGL261C	PAU11
YGL262W
YGL263W	COS12
YGR001C
YGR003W	CUL3
YGR007W	ECT1
YGR010W	NMA2
YGR011W
YGR014W	MSB2
YGR017W
YGR018C
YGR022C
YGR023W	MTL1
YGR025W
YGR026W
YGR027C	RPS25A
YGR031W	IMO32
YGR033C	TIM21
YGR038W	ORM1
YGR039W
YGR040W	KSS1
YGR042W
YGR043C	NQM1
YGR044C	RME1
YGR045C
YGR049W	SCM4
YGR051C
YGR052W	FMP48
YGR053C
YGR054W
YGR057C	LST7
YGR058W	PEF1
YGR059W	SPR3
YGR062C	COX18
YGR067C
YGR068C	ART5
YGR069W
YGR077C	PEX8
YGR079W
YGR080W	TWF1
YGR084C	MRP13
YGR087C	PDC6
YGR088W	CTT1
YGR093W
YGR096W	TPC1
YGR100W	MDR1
YGR102C	GTF1
YGR106C	VOA1
YGR108W	CLB1
YGR109C	CLB6
YGR110W	CLD1
YGR121C	MEP1
YGR122C-A
YGR124W	ASN2
YGR125W
YGR126W
YGR129W	SYF2
YGR131W	FHN1
YGR132C	PHB1
YGR133W	PEX4
YGR134W	CAF130
YGR136W	LSB1
YGR137W
YGR138C	TPO2
YGR141W	VPS62
YGR142W	BTN2
YGR143W	SKN1
YGR144W	THI4
YGR146C	ECL1
YGR149W
YGR153W
YGR154C	GTO1
YGR164W
YGR168C
YGR169C	PUS6
YGR170W	PSD2
YGR171C	MSM1
YGR173W	RBG2
YGR176W
YGR178C	PBP1
YGR181W	TIM13
YGR187C	HGH1
YGR189C	CRH1
YGR194C	XKS1
YGR199W	PMT6
YGR201C
YGR203W	YCH1
YGR205W	TDA10
YGR207C	CIR1
YGR209C	TRX2
YGR210C
YGR212W	SLI1
YGR213C	RTA1
YGR220C	MRPL9
YGR221C	TOS2
YGR222W	PET54
YGR224W	AZR1
YGR225W	AMA1
YGR227W	DIE2
YGR228W
YGR230W	BNS1
YGR231C	PHB2
YGR232W	NAS6
YGR234W	YHB1
YGR235C	MOS2
YGR236C	SPG1
YGR237C
YGR238C	KEL2
YGR239C	PEX21
YGR241C	YAP1802
YGR242W
YGR244C	LSC2
YGR247W	CPD1
YGR249W	MGA1
YGR250C
YGR254W	ENO1
YGR255C	COQ6
YGR256W	GND2
YGR258C	RAD2
YGR260W	TNA1
YGR268C	HUA1
YGR269W
YGR271W	SLH1
YGR272C
YGR273C
YGR275W	RTT102
YGR276C	RNH70
YGR279C	SCW4
YGR281W	YOR1
YGR283C
YGR284C	ERV29
YGR286C	BIO2
YGR287C	IMA1
YGR288W	MAL13
YGR289C	MAL11
YGR290W
YGR291C
YGR292W	MAL12
YGR295C	COS6
YHL005C
YHL006C	SHU1
YHL008C
YHL009C	YAP3
YHL013C	OTU2
YHL014C	YLF2
YHL017W
YHL021C	AIM17
YHL022C	SPO11
YHL023C	NPR3
YHL026C
YHL028W	WSC4
YHL029C	OCA5
YHL032C	GUT1
YHL034C	SBP1
YHL035C	VMR1
YHL036W	MUP3
YHL037C
YHL038C	CBP2
YHL039W	EFM1
YHL042W
YHL044W
YHL046C	PAU13
YHR001W-A	QCR10
YHR003C	TCD1
YHR006W	STP2
YHR013C	ARD1
YHR017W	YSC83
YHR018C	ARG4
YHR021W-A	ECM12
YHR022C
YHR028C	DAP2
YHR030C	SLT2
YHR032W	ERC1
YHR038W	RRF1
YHR039C	MSC7
YHR043C	DOG2
YHR044C	DOG1
YHR045W
YHR046C	INM1
YHR047C	AAP1
YHR048W	YHK8
YHR049W	FSH1
YHR051W	COX6
YHR057C	CPR2
YHR061C	GIC1
YHR066W	SSF1
YHR067W	HTD2
YHR072W-A	NOP10
YHR073W	OSH3
YHR075C	PPE1
YHR076W	PTC7
YHR077C	NMD2
YHR078W
YHR080C
YHR082C	KSP1
YHR087W	RTC3
YHR092C	HXT4
YHR095W
YHR096C	HXT5
YHR103W	SBE22
YHR105W	YPT35
YHR109W	CTM1
YHR110W	ERP5
YHR111W	UBA4
YHR112C
YHR114W	BZZ1
YHR115C	DMA1
YHR116W	COX23
YHR117W	TOM71
YHR121W	LSM12
YHR123W	EPT1
YHR124W	NDT80
YHR126C	ANS1
YHR127W
YHR130C
YHR131C
YHR132C	ECM14
YHR132W-A	IGO2
YHR133C	NSG1
YHR134W	WSS1
YHR135C	YCK1
YHR137W	ARO9
YHR138C
YHR139C	SPS100
YHR142W	CHS7
YHR143W	DSE2
YHR146W	CRP1
YHR147C	MRPL6
YHR151C	MTC6
YHR155W	YSP1
YHR156C	LIN1
YHR157W	REC104
YHR158C	KEL1
YHR159W	TDA11
YHR161C	YAP1801
YHR162W	MPC2
YHR163W	SOL3
YHR171W	ATG7
YHR176W	FMO1
YHR177W
YHR179W	OYE2
YHR180W
YHR182W
YHR184W	SSP1
YHR185C	PFS1
YHR189W	PTH1
YHR193C	EGD2
YHR195W	NVJ1
YHR199C	AIM46
YHR200W	RPN10
YHR202W
YHR204W	MNL1
YHR206W	SKN7
YHR207C	SET5
YHR210C
YIL005W	EPS1
YIL007C	NAS2
YIL009W	FAA3
YIL010W	DOT5
YIL011W	TIR3
YIL012W
YIL015W	BAR1
YIL020C	HIS6
YIL024C
YIL027C	EMC5
YIL028W
YIL030C	SSM4
YIL032C
YIL035C	CKA1
YIL042C	PKP1
YIL044C	AGE2
YIL045W	PIG2
YIL046W	MET30
YIL052C	RPL34B
YIL054W
YIL055C
YIL057C	RGI2
YIL058W
YIL066C	RNR3
YIL067C
YIL070C	MAM33
YIL071C	PCI8
YIL072W	HOP1
YIL074C	SER33
YIL079C	AIR1
YIL084C	SDS3
YIL085C	KTR7
YIL086C
YIL088C	AVT7
YIL089W
YIL090W	ICE2
YIL092W
YIL094C	LYS12
YIL096C
YIL099W	SGA1
YIL101C	XBP1
YIL107C	PFK26
YIL108W
YIL111W	COX5B
YIL112W	HOS4
YIL113W	SDP1
YIL114C	POR2
YIL116W	HIS5
YIL117C	PRM5
YIL119C	RPI1
YIL120W	QDR1
YIL121W	QDR2
YIL125W	KGD1
YIL131C	FKH1
YIL132C	CSM2
YIL135C	VHS2
YIL136W	OM45
YIL137C	TMA108
YIL138C	TPM2
YIL139C	REV7
YIL140W	AXL2
YIL141W
YIL145C	PAN6
YIL146C	ATG32
YIL148W	RPL40A
YIL152W
YIL153W	RRD1
YIL154C	IMP2'
YIL155C	GUT2
YIL156W	UBP7
YIL159W	BNR1
YIL160C	POT1
YIL162W	SUC2
YIL163C
YIL164C	NIT1
YIL165C
YIL168W
YIL170W
YIL173W	VTH1
YIR001C	SGN1
YIR004W	DJP1
YIR005W	IST3
YIR007W
YIR013C	GAT4
YIR016W
YIR018W	YAP5
YIR019C	FLO11
YIR020C
YIR020W-B
YIR021W	MRS1
YIR023W	DAL81
YIR024C
YIR025W	MND2
YIR027C	DAL1
YIR030C	DCG1
YIR032C	DAL3
YIR033W	MGA2
YIR036C	IRC24
YIR037W	HYR1
YIR038C	GTT1
YIR039C	YPS6
YIR042C
YIR043C
YJL007C
YJL013C	MAD3
YJL017W
YJL023C	PET130
YJL027C
YJL028W
YJL030W	MAD2
YJL037W	IRC18
YJL038C	LOH1
YJL042W	MHP1
YJL043W
YJL044C	GYP6
YJL045W
YJL048C	UBX6
YJL049W
YJL052W	TDH1
YJL053W	PEP8
YJL055W
YJL056C	ZAP1
YJL057C	IKS1
YJL058C	BIT61
YJL060W	BNA3
YJL064W
YJL065C	DLS1
YJL066C	MPM1
YJL067W
YJL070C
YJL071W	ARG2
YJL073W	JEM1
YJL077C	ICS3
YJL078C	PRY3
YJL079C	PRY1
YJL080C	SCP160
YJL082W	IML2
YJL083W	TAX4
YJL084C	ALY2
YJL093C	TOK1
YJL094C	KHA1
YJL098W	SAP185
YJL099W	CHS6
YJL100W	LSB6
YJL101C	GSH1
YJL103C	GSM1
YJL105W	SET4
YJL106W	IME2
YJL107C
YJL108C	PRM10
YJL110C	GZF3
YJL112W	MDV1
YJL118W
YJL119C
YJL120W
YJL122W	ALB1
YJL123C	MTC1
YJL124C	LSM1
YJL128C	PBS2
YJL130C	URA2
YJL131C	AIM23
YJL132W
YJL133W	MRS3
YJL137C	GLG2
YJL144W
YJL145W	SFH5
YJL146W	IDS2
YJL147C
YJL148W	RPA34
YJL149W	DAS1
YJL150W
YJL151C	SNA3
YJL152W
YJL154C	VPS35
YJL155C	FBP26
YJL158C	CIS3
YJL159W	HSP150
YJL160C
YJL161W	FMP33
YJL166W	QCR8
YJL168C	SET2
YJL169W
YJL170C	ASG7
YJL171C
YJL177W	RPL17B
YJL178C	ATG27
YJL179W	PFD1
YJL182C
YJL185C	ATG36
YJL186W	MNN5
YJL187C	SWE1
YJL189W	RPL39
YJL190C	RPS22A
YJL191W	RPS14B
YJL192C	SOP4
YJL193W
YJL196C	ELO1
YJL197W	UBP12
YJL198W	PHO90
YJL199C	MBB1
YJL206C-A
YJL207C	LAA1
YJL208C	NUC1
YJL209W	CBP1
YJL210W	PEX2
YJL211C
YJL212C	OPT1
YJL213W
YJL215C
YJL216C	IMA5
YJL217W	REE1
YJR003C
YJR004C	SAG1
YJR005W	APL1
YJR009C	TDH2
YJR010C-A	SPC1
YJR011C
YJR014W	TMA22
YJR015W
YJR019C	TES1
YJR020W
YJR021C	REC107
YJR024C	MDE1
YJR025C	BNA1
YJR026W
YJR031C	GEA1
YJR033C	RAV1
YJR035W	RAD26
YJR036C	HUL4
YJR038C
YJR044C	VPS55
YJR048W	CYC1
YJR049C	UTR1
YJR050W	ISY1
YJR052W	RAD7
YJR053W	BFA1
YJR054W	KCH1
YJR056C
YJR058C	APS2
YJR060W	CBF1
YJR061W
YJR062C	NTA1
YJR069C	HAM1
YJR073C	OPI3
YJR075W	HOC1
YJR077C	MIR1
YJR078W	BNA2
YJR080C	AIM24
YJR082C	EAF6
YJR083C	ACF4
YJR084W
YJR087W
YJR088C	EMC2
YJR094C	IME1
YJR094W-A	RPL43B
YJR095W	SFC1
YJR096W
YJR098C
YJR099W	YUH1
YJR100C	AIM25
YJR103W	URA8
YJR107W
YJR108W	ABM1
YJR109C	CPA2
YJR110W	YMR1
YJR111C
YJR115W
YJR116W	TDA4
YJR117W	STE24
YJR119C	JHD2
YJR120W
YJR121W	ATP2
YJR124C
YJR125C	ENT3
YJR126C	VPS70
YJR127C	RSF2
YJR128W
YJR130C	STR2
YJR131W	MNS1
YJR133W	XPT1
YJR134C	SGM1
YJR137C	MET5
YJR140C	HIR3
YJR142W
YJR144W	MGM101
YJR146W
YJR147W	HMS2
YJR148W	BAT2
YJR149W
YJR150C	DAN1
YJR152W	DAL5
YJR153W	PGU1
YJR154W
YKL003C	MRP17
YKL005C	BYE1
YKL007W	CAP1
YKL010C	UFD4
YKL011C	CCE1
YKL015W	PUT3
YKL017C	HCS1
YKL020C	SPT23
YKL025C	PAN3
YKL026C	GPX1
YKL027W	TCD2
YKL029C	MAE1
YKL030W
YKL033W-A
YKL038W	RGT1
YKL039W	PTM1
YKL040C	NFU1
YKL043W	PHD1
YKL047W	ANR2
YKL048C	ELM1
YKL050C
YKL051W	SFK1
YKL053C-A	MDM35
YKL053W
YKL056C	TMA19
YKL061W	BLI1
YKL062W	MSN4
YKL064W	MNR2
YKL067W	YNK1
YKL068W	NUP100
YKL069W
YKL070W
YKL071W
YKL072W	STB6
YKL074C	MUD2
YKL075C
YKL076C	PSY1
YKL077W
YKL079W	SMY1
YKL081W	TEF4
YKL085W	MDH1
YKL086W	SRX1
YKL087C	CYT2
YKL090W	CUE2
YKL091C
YKL092C	BUD2
YKL093W	MBR1
YKL094W	YJU3
YKL098W	MTC2
YKL100C
YKL101W	HSL1
YKL102C
YKL103C	APE1
YKL106W	AAT1
YKL107W
YKL109W	HAP4
YKL117W	SBA1
YKL120W	OAC1
YKL121W	DGR2
YKL123W
YKL124W	SSH4
YKL127W	PGM1
YKL128C	PMU1
YKL129C	MYO3
YKL130C	SHE2
YKL131W
YKL132C	RMA1
YKL133C
YKL137W	CMC1
YKL140W	TGL1
YKL142W	MRP8
YKL146W	AVT3
YKL147C
YKL149C	DBR1
YKL151C
YKL155C	RSM22
YKL156W	RPS27A
YKL157W	APE2
YKL158W
YKL159C	RCN1
YKL160W	ELF1
YKL162C
YKL162C-A
YKL163W	PIR3
YKL164C	PIR1
YKL166C	TPK3
YKL175W	ZRT3
YKL179C	COY1
YKL184W	SPE1
YKL185W	ASH1
YKL197C	PEX1
YKL198C	PTK1
YKL199C
YKL201C	MNN4
YKL202W
YKL206C	ADD66
YKL207W	EMC3
YKL208W	CBT1
YKL214C	YRA2
YKL215C	OXP1
YKL216W	URA1
YKL217W	JEN1
YKL218C	SRY1
YKL220C	FRE2
YKL222C
YKR003W	OSH6
YKR005C
YKR007W	MEH1
YKR009C	FOX2
[truncated: 2,293 more rows]
[truncated: 4 more columns]

## Sheet: Dataset S2a
Dataset S2a. List of different overrepresented sensitive gene ontology (GO) terms and their FDR adjusted p-values.
	Sub-type	Description	GO term	IC5 - 10 generations	IC5 - 15 generations	IC10 - 10 generations	IC10 - 15 generations	IC20 - 10 generations	IC20 - 15 generations
Biological Process	Growth	growth	GO:0040007						0.0476
Biological Process	Growth	filamentous growth	GO:0030447					0.033
Biological Process	Growth	invasive growth in response to glucose limitation	GO:0001403					0.0359
Biological Process	Growth	invasive filamentous growth	GO:0036267
Biological Process	Cellular Response to Stimulus	cellular response to pH	GO:0071467						0.059
Biological Process	Cellular Response to Stimulus	carbon catabolite repression of transcription from RNA polymerase II promoter by glucose	GO:0000433
Biological Process	Cellular Response to Stimulus	carbon catabolite repression of transcription by glucose	GO:0045014
Biological Process	Cellular Response to Stimulus	regulation of transcription from RNA polymerase II promoter by glucose	GO:0000430
Biological Process		apoptotic mitochondrial changes	GO:0008637						0.0474
Biological Process		secretion by cell	GO:0032940			0.041
Biological Process		negative regulation of cellular process	GO:0048523						0.000407
Biological Process	Cellular Component Organization	vesicle organization	GO:0016050			0.000104	4.17e-05		0.00378
Biological Process	Cellular Component Organization	membrane organization	GO:0061024			0.00171
Biological Process	Cellular Component Organization	membrane fusion	GO:0061025			0.00239
Biological Process	Cellular Component Organization	organelle membrane fusion	GO:0090174			0.00506
Biological Process	Cellular Component Organization	endoplasmic reticulum inheritance	GO:0048309
Biological Process	Cellular Component Organization	endoplasmic reticulum organization	GO:0007029
Biological Process	Cellular Component Organization	intralumenal vesicle formation	GO:0070676				0.00337
Biological Process	Cellular Component Organization	endosome organization	GO:0007032				0.0371
Biological Process		cellular sphingolipid homeostasis	GO:0090156			0.0163	0.0405
Biological Process		cellular localization	GO:0051641		0.015	6.72e-08	1.26e-07	0.00518	2.5e-05
Biological Process	cellular macromolecule localization	cellular macromolecule localization	GO:0070727	0.0438	0.0064	0.000144	0.00104	0.0348	0.004
Biological Process	Cellular Macromolecule Localization	protein localization to vacuole	GO:0072665	0.0136	0.0041	1.2e-07	1.29e-07	0.00162	5.44e-06
Biological Process	Cellular Macromolecule Localization	protein localization to organelle	GO:0033365	0.0182	0.00117	3.55e-05	0.000279	0.0386	0.000536
Biological Process	Cellular Macromolecule Localization	cellular protein localization	GO:0034613	0.0405	0.00554	7.15e-05	0.00115		0.00215
Biological Process	Cellular Macromolecule Localization	protein targeting	GO:0006605			0.0421	0.0492		0.0287
Biological Process	Cellular Macromolecule Localization	intracellular protein transport	GO:0006886			0.000107	0.0142		0.0366
Biological Process	Cellular Macromolecule Localization	protein localization to plasma membrane	GO:0072659		0.0061	0.000583	0.0294
Biological Process	Cellular Macromolecule Localization	protein localization to cell periphery	GO:1990778		0.00967	0.0025
Biological Process	Cellular Macromolecule Localization	protein localization to Golgi apparatus	GO:0034067	0.0205	0.000439	0.0295
Biological Process		establishment of localization in cell	GO:0051649			5.54e-07	5e-07	0.014	1.79e-05
Biological Process	Intracellular Transport	endosomal transport	GO:0016197			4.43e-09	1.31e-10	2.12e-05	1.69e-06
Biological Process	Intracellular Transport	endosome transport via multivesicular body sorting pathway	GO:0032509			0.0197	3.01e-06	1.67e-05	9.16e-06
Biological Process	Intracellular Transport	late endosome to vacuole transport	GO:0045324			0.000895	2.25e-08	2.28e-05	1.5e-05
Biological Process	Intracellular Transport	late endosome to vacuole transport via multivesicular body sorting pathway	GO:0032511			0.00843	4.56e-05	3.67e-05	1.67e-05
Biological Process	Intracellular Transport	cytosolic transport	GO:0016482			7.02e-05	0.00605
Biological Process	Intracellular Transport	retrograde transport, endosome to Golgi	GO:0042147			9.89e-05	0.00689
Biological Process	Intracellular Transport	Golgi to vacuole transport	GO:0006896
Biological Process	intracellular transport	intracellular transport	GO:0046907			1.67e-07	4.35e-07	0.00907	1.02e-05
Biological Process		process utilizing autophagic mechanism	GO:0061919	0.023	0.000665	7.07e-08	2.85e-06		1.16e-05
Biological Process		protein localization by the Cvt pathway	GO:0032258	0.00132	8.67e-05	1.2e-06	2.92e-06		0.00563
Biological Process	Vesicle-mediated Transport	vacuolar transport	GO:0007034			4.86e-06	1.53e-08	0.00109	1.64e-05
Biological Process	Vesicle-mediated Transport	vesicle-mediated transport	GO:0016192	0.00521	0.000442	7.73e-17	2.88e-12	1.15e-05	8.71e-08
Biological Process	Vesicle-mediated Transport	multivesicular body sorting pathway	GO:0071985			0.0194	2.86e-06	1.39e-05	8.14e-06
Biological Process	Vesicle-mediated Transport	Golgi vesicle transport	GO:0048193	0.000111	8.7e-05	7.72e-06	0.00175		0.00698
Biological Process	Vesicle-mediated Transport	intra-Golgi vesicle-mediated transport	GO:0006891	0.00265	9.16e-05	0.002	0.0006		0.0236
Biological Process	Vesicle-mediated Transport	post-Golgi vesicle-mediated transport	GO:0006892	0.041		8.14e-05	0.00692
Biological Process	Vesicle-mediated Transport	Golgi to plasma membrane transport	GO:0006893	0.0063	0.00872	0.00149
Biological Process	Vesicle-mediated Transport	endocytosis	GO:0006897			0.00211	0.0302
Biological Process	Vesicle-mediated Transport	vesicle-mediated transport to the plasma membrane	GO:0098876	0.00708	0.00913	0.00245
Biological Process	Vesicle-mediated Transport	vesicle fusion	GO:0006906			0.00273
Biological Process	Vesicle-mediated Transport	vesicle docking	GO:0048278			0.00515	0.0226
Biological Process	Vesicle-mediated Transport	vesicle budding from membrane	GO:0006900				0.00345
Biological Process	Transport	transport	GO:0006810			1.96e-05	0.000489
Biological Process	Transport	ATP export	GO:1904669			1.58e-05	3.13e-07	3.11e-07	1.55e-06
Biological Process	Transport	ATP transport	GO:0015867			0.00279	5.8e-05	9.94e-05	0.000356
Biological Process	Transport	peptide transport	GO:0015833	0.0149	0.0117	1.72e-09	8.69e-08	0.0138	0.000349
Biological Process	Transport	purine ribonucleotide transport	GO:0015868			0.00411	0.000103	0.000148	0.000457
Biological Process	Transport	adenine nucleotide transport	GO:0051503			0.00403	9.94e-05	0.000136	0.000439
Biological Process	Transport	amide transport	GO:0042886	0.014	0.0128	1.63e-09	1.39e-07	0.0178	0.000465
Biological Process	Transport	purine nucleotide transport	GO:0015865			0.00479	0.000124	0.000159	0.000511
Biological Process	Transport	nucleotide transport	GO:0006862			0.00737	0.000253	0.000285	0.000906
Biological Process	Transport	carbohydrate derivative transport	GO:1901264			0.0286	0.00165	0.00154	0.00418
Biological Process	Transport	organophosphate ester transport	GO:0015748			0.00135	0.00079	0.00149	0.023
Biological Process	Transport	nitrogen compound transport	GO:0071705	0.0399		9.44e-07	3.91e-05		0.0461
Biological Process	Transport	organic substance transport	GO:0071702			8.08e-06	0.000174
Biological Process	Transport	import into cell	GO:0098657			0.00946	0.014
Biological Process	Transport	secretion	GO:0046903			0.0404
Biological Process	Transport	anion transport	GO:0006820					0.0263
Biological Process	Transport	organic anion transport	GO:0015711
Biological Process	Transport	nucleobase-containing compound transport	GO:0015931				0.0496
Biological Process		localization	GO:0051179			0.000202	0.000598
Biological Process		establishment of localization	GO:0051234			3.8e-05	0.000478
Biological Process	Establishment of Protein Localization	protein targeting to vacuole	GO:0006623			0.00024	0.00011	0.0142	0.000235
Biological Process	Establishment of Protein Localization	establishment of protein localization to vacuole	GO:0072666			0.00152	0.000909	0.0108	0.000224
Biological Process	Establishment of Protein Localization	establishment of protein localization to organelle	GO:0072594						0.0117
Biological Process	Establishment of Protein Localization	Golgi to plasma membrane protein transport	GO:0043001	0.0376	0.00131	0.00599
Biological Process	Establishment of Protein Localization	establishment of protein localization to plasma membrane	GO:0061951	0.0355	0.00115	0.00589
Biological Process	Establishment of Protein Localization	establishment of protein localization to membrane	GO:0090150
Biological Process	Establishment of Protein Localization	protein transport	GO:0015031	0.0155	0.0122	1.4e-09	6.04e-08	0.0123	0.000284
Biological Process	Establishment of Protein Localization	establishment of protein localization	GO:0045184	0.0142	0.0121	2.07e-09	1.16e-07	0.0154	0.000391
Biological Process	Macromolecule Localization	protein localization	GO:0008104	0.0282	0.0365	4.72e-08	4.21e-07	0.0266	0.00167
Biological Process	Macromolecule Localization	macromolecule localization	GO:0033036	0.0315	0.0429	8.69e-08	3.89e-07	0.0174	0.00285
Biological Process	Cellular Metabolic Process	negative regulation of cellular metabolic process	GO:0031324						0.00317
Biological Process	Cellular Metabolic Process	sphingolipid metabolic process	GO:0006665		0.022	0.000356	0.000459
Biological Process	Cellular Metabolic Process	membrane lipid metabolic process	GO:0006643		0.0338	0.00123	0.00159
Biological Process	Cellular Metabolic Process	cellular lipid metabolic process	GO:0044255			0.0487
Biological Process	Cellular Metabolic Process	nucleobase-containing small molecule metabolic process	GO:0055086
Biological Process	Cellular Metabolic Process	nucleoside phosphate metabolic process	GO:0006753
Biological Process		negative regulation of metabolic process	GO:0009892						0.00797
Biological Process		negative regulation of nitrogen compound metabolic process	GO:0051172						0.00825
Biological Process		organonitrogen compound metabolic process	GO:1901564					0.0124
Biological Process		nitrogen compound metabolic process	GO:0006807					0.0353
Biological Process	Organic Substance Metabolic Process	glycosphingolipid metabolic process	GO:0006687		0.012	0.00724	0.02
Biological Process	Organic Substance Metabolic Process	protein glycosylation	GO:0006486
Biological Process	Organic Substance Metabolic Process	protein N-linked glycosylation	GO:0006487
Biological Process	Organic Substance Metabolic Process	carbohydrate derivative biosynthetic process	GO:1901137
Biological Process	Organic Substance Metabolic Process	wybutosine metabolic process	GO:0031590
Biological Process	Organic Substance Metabolic Process	wybutosine biosynthetic process	GO:0031591
Biological Process	ORganic Substance Metabolic Process	oligosaccharide-lipid intermediate biosynthetic process	GO:0006490
Biological Process	Organic Substance Metabolic Process	glycolipid biosynthetic process	GO:0009247		0.0325
Biological Process	Organic Substance Metabolic Process	glycosphingolipid biosynthetic process	GO:0006688		0.00841
Biological Process	ORganic Substance Metabolic Process	glycolipid metabolic process	GO:0006664
Biological Process	ORganic Substance Metabolic Process	liposaccharide metabolic process	GO:1903509
Biological Process	Organic Substance Metabolic Process	lipid biosynthetic process	GO:0008610			0.0325
Biological Process	Organic Substance Metabolic Process	negative regulation of macromolecule metabolic process	GO:0010605						0.019
Biological Process	Organic Substance Metabolic Process	proteolysis	GO:0006508				0.00821	0.0177	0.0194
Biological Process	Organic Substance Metabolic Process	negative regulation of macromolecule biosynthetic process	GO:0010558						0.0217
Biological Process	Organic Substance Metabolic Process	regulation of nucleic acid-templated transcription	GO:1903506						0.0299
Biological Process	Organic Substance Metabolic Process	regulation of RNA metabolic process	GO:0051252						0.0332
Biological Process	Organic Substance Metabolic Process	negative regulation of RNA metabolic process	GO:0051253						0.0378
Biological Process	Organic Substance Metabolic Process	protein metabolic process	GO:0019538					0.0116
Biological Process	Organic Substance Metabolic Process	cytoplasmic translation	GO:0002181
Biological Process	Organic Substance Metabolic Process	lipid metabolic process	GO:0006629			0.0445
Biological Process	Biosynthetic Process	negative regulation of biosynthetic process	GO:0009890						0.00725
Biological Process	Biosynthetic Process	negative regulation of cellular biosynthetic process	GO:0031327						0.00708
Biological Process	Biosynthetic Process	negative regulation of RNA biosynthetic process	GO:1902679						0.0297
Biological Process	Biosynthetic Process	negative regulation of nucleic acid-templated transcription	GO:1903507						0.0292
Biological Process	Biosynthetic Process	regulation of RNA biosynthetic process	GO:2001141						0.0304
Biological Process	Biosynthetic Process	negative regulation of cellular macromolecule biosynthetic process	GO:2000113						0.0465
Biological Process	Biosynthetic Process	regulation of transcription, DNA-templated	GO:0006355						0.0592
Biological Process	Biosynthetic Process	sphingolipid biosynthetic process	GO:0030148		0.00889	0.018	0.0104	0.0106
Biological Process	Biosynthetic Process	membrane lipid biosynthetic process	GO:0046467		0.0122	0.0392	0.0259	0.0175
Biological Process	Biosynthetic Process	negative regulation of transcription from RNA polymerase II promoter by glucose	GO:0061987
Biological Process	Biosynthetic Process	negative regulation of transcription by glucose	GO:0061986
Biological Process	Catabolic Process	ubiquitin-dependent protein catabolic process via the multivesicular body sorting pathway	GO:0043162			2.6e-06	3.66e-08	5.03e-08	1.91e-07
Biological Process	Catabolic Process	autophagy	GO:0006914			0.000597	0.00135		0.000392
Biological Process	Catabolic Process	ubiquitin-dependent protein catabolic process	GO:0006511				0.0199	0.0423	0.00523
Biological Process	Catabolic Process	modification-dependent protein catabolic process	GO:0019941				0.0262		0.00677
Biological Process	Catabolic Process	protein transport to vacuole involved in ubiquitin-dependent protein catabolic process via the multivesicular body sorting pathway	GO:0043328					0.00718	0.0103
Biological Process	Catabolic Process	modification-dependent macromolecule catabolic process	GO:0043632				0.0423		0.0103
Biological Process	Catabolic Process	proteolysis involved in cellular protein catabolic process	GO:0051603				0.0304		0.019
Biological Process	Catabolic Process	cellular catabolic process	GO:0044248						0.0398
Biological Process	Catabolic Process	catabolic process	GO:0009056						0.0418
Biological Process	Catabolic Process	macroautophagy	GO:0016236			0.00761	0.000222
Biological Process	Catabolic Process	selective autophagy	GO:0061912				0.0214
Biological Process	Catabolic Process	cellular macromolecule catabolic process	GO:0044265				0.0308
Biological Process		macromolecule glycosylation	GO:0043413
Biological Process		glycosylation	GO:0070085
Biological Process		NAD metabolic process	GO:0019674
Biological Process	Response to Stimulus	drug export	GO:0046618			0.000301	2.22e-05	1.04e-05	2.12e-05
Biological Process	Response to Stimulus	response to pH	GO:0009268						0.0377
Biological Process	Response to Stimulus	drug transport	GO:0015893				0.0496	0.0188	0.0513
Biological Process		negative regulation of biological process	GO:0048519						0.00126
Molecular Function	Binding	phosphoprotein binding	GO:0051219						0.719
Molecular Function	Binding	protein binding	GO:0005515						0.38
Molecular Function	Binding	SNARE binding	GO:0000149
Molecular Function	Binding	phospholipid binding	GO:0005543
Molecular Function	Catalytic Activity	dolichyl pyrophosphate Glc1Man9GlcNAc2 alpha-1,3-glucosyltransferase activity	GO:0042283
Molecular Function	Catalytic Activity	transferase activity, transferring hexosyl groups	GO:0016758
Molecular Function		SNAP receptor activity	GO:0005484
Molecular Function		transcription coregulator activity	GO:0003712						0.651
Molecular Function		structural constituent of ribosome	GO:0003735
Cellular Component		cytoplasmic side of plasma membrane	GO:0009898			0.00268	0.00871	0.00338	0.00492
Cellular Component		endomembrane system	GO:0012505			0.00213	0.00217
Cellular Component	Endosome	ESCRT complex	GO:0036452			1.18e-05	8.78e-09	2.38e-07	1.77e-06
Cellular Component	Endosome	endosome membrane	GO:0010008			5.17e-07	3.05e-12	0.000128	2.64e-06
Cellular Component	Endosome	endosome	GO:0005768			4.97e-06	2.44e-09	0.00778	0.00137
Cellular Component	Endosome	ESCRT II complex	GO:0000814			0.000821	0.00267	0.0011	0.00204
Cellular Component	Endosome	multivesicular body	GO:0005771				2.48e-05	0.0312	0.00432
Cellular Component	Endosome	ESCRT I complex	GO:0000813					0.00381	0.00532
Cellular Component	Endosome	late endosome membrane	GO:0031902			0.00068	0.00468	0.000497	0.00964
Cellular Component	Endosome	ESCRT III complex	GO:0000815				4.48e-05
Cellular Component	Endosome	late endosome	GO:0005770				0.000267
Cellular Component		endoplasmic reticulum membrane	GO:0005789
Cellular Component	Membrane	membrane	GO:0016020		0.0243	0.00359		0.03	0.0154
Cellular Component	Membrane	membrane protein complex	GO:0098796			6.83e-05	0.000265	0.000352	0.00119
Cellular Component	Membrane	whole membrane	GO:0098805			0.00714	0.0027		0.0232
Cellular Component	Membrane	cytoplasmic side of membrane	GO:0098562					0.0251	0.0345
Cellular Component	Membrane	side of membrane	GO:0098552					0.00671
Cellular Component	Membrane	AP-type membrane coat adaptor complex	GO:0030119
Cellular Component	Membrane	AP-3 adaptor complex	GO:0030123
Cellular Component	Membrane	membrane coat	GO:0030117
Cellular Component	Organelle	organelle	GO:0043226			0.00133
Cellular Component	Organelle	bounding membrane of organelle	GO:0098588			5.1e-06	6.27e-05		0.00123
Cellular Component	Organelle	vesicle	GO:0031982			7.56e-05	1.03e-06		0.00315
Cellular Component	Organelle	organelle membrane	GO:0031090			0.00623			0.00355
Cellular Component	Organelle	vesicle membrane	GO:0012506
Cellular Component	Intracellular Organelle	intracellular vesicle	GO:0097708			7.17e-05	8.89e-07		0.00592
Cellular Component	Intracellular Organelle	organelle subcompartment	GO:0031984			9.87e-05
Cellular Component	Intracellular Organelle	SAGA-type complex	GO:0070461			0.00503	0.0223
Cellular Component	Intracellular Organelle	ribosome	GO:0005840					0.0267
Cellular Component	Intracellular Organelle	ribosomal subunit	GO:0044391					0.0392
Cellular Component	Intracellular Organelle	intracellular membrane-bounded organelle	GO:0043231
Cellular Component	Cytoplasm	cytoplasmic vesicle	GO:0031410			6.69e-05	7.62e-07		0.00553
Cellular Component	Cytoplasm	Golgi transport complex	GO:0017119	5.46e-05	2.53e-07	0.000133	0.000624		0.00922
Cellular Component	Cytoplasm	Golgi membrane	GO:0000139	0.000123	4.4e-05	2.1e-05	0.0324	0.029	0.0265
Cellular Component	Cytoplasm	Golgi apparatus	GO:0005794	0.0021	5.83e-05	2.95e-07	0.000122
Cellular Component	Cytoplasm	SNARE complex	GO:0031201			6.65e-05
Cellular Component	Cytoplasm	Golgi subcompartment	GO:0098791			0.000125
Cellular Component	Cytoplasm	cytosol	GO:0005829			0.000155	0.00189
Cellular Component	Cytoplasm	trans-Golgi network	GO:0005802			0.000593	0.0324
Cellular Component	Cytoplasm	cytosolic small ribosomal subunit	GO:0022627			0.023
Cellular Component	Cytoplasm	endoplasmic reticulum	GO:0005783
Cellular Component	Cytoplasm	cytoplasmic vesicle membrane	GO:0030659
Cellular Component		intracellular organelle	GO:0043229			0.00128
Cellular Component	Protein-containing Complex	protein-containing complex	GO:0032991			4.41e-06	0.000668	0.0299
Cellular Component	Protein-containing Complex	tethering complex	GO:0099023	0.00131	4.79e-05	3.98e-05	2.74e-05
Cellular Component	Protein-containing Complex	SAGA complex	GO:0000124			0.0013	0.00563
Cellular Component	Protein-containing Complex	Cdc50p-Drs2p complex	GO:1990530			0.0203
Cellular Component	Protein-containing Complex	90S preribosome	GO:0030686					0.029

## Sheet: Dataset S2b
Dataset S2b. List of different overrepresented resistant gene ontology (GO) terms and their FDR adjusted p-values.
	Sub-type	Description	GO term	IC5 - 10 generations	IC5 - 15 generations	IC10 - 10 generations	IC10 - 15 generations	IC20 - 10 generations	IC20 - 15 generations
Biological Process	Growth	growth	GO:0040007
Biological Process	Growth	filamentous growth	GO:0030447
Biological Process	Growth	invasive growth in response to glucose limitation	GO:0001403
Biological Process	Growth	invasive filamentous growth	GO:0036267
Biological Process	Cellular Response to Stimulus	cellular response to pH	GO:0071467
Biological Process	Cellular Response to Stimulus	carbon catabolite repression of transcription from RNA polymerase II promoter by glucose	GO:0000433
Biological Process	Cellular Response to Stimulus	carbon catabolite repression of transcription by glucose	GO:0045014
Biological Process	Cellular Response to Stimulus	regulation of transcription from RNA polymerase II promoter by glucose	GO:0000430
Biological Process		apoptotic mitochondrial changes	GO:0008637
Biological Process		secretion by cell	GO:0032940
Biological Process		negative regulation of cellular process	GO:0048523
Biological Process	Cellular Component Organization	vesicle organization	GO:0016050
Biological Process	Cellular Component Organization	membrane organization	GO:0061024
Biological Process	Cellular Component Organization	membrane fusion	GO:0061025
Biological Process	Cellular Component Organization	organelle membrane fusion	GO:0090174
Biological Process	Cellular Component Organization	endoplasmic reticulum inheritance	GO:0048309
Biological Process	Cellular Component Organization	endoplasmic reticulum organization	GO:0007029
Biological Process	Cellular Component Organization	intralumenal vesicle formation	GO:0070676
Biological Process	Cellular Component Organization	endosome organization	GO:0007032
Biological Process		cellular sphingolipid homeostasis	GO:0090156
Biological Process		cellular localization	GO:0051641
Biological Process	cellular macromolecule localization	cellular macromolecule localization	GO:0070727
Biological Process	Cellular Macromolecule Localization	protein localization to vacuole	GO:0072665
Biological Process	Cellular Macromolecule Localization	protein localization to organelle	GO:0033365
Biological Process	Cellular Macromolecule Localization	cellular protein localization	GO:0034613
Biological Process	Cellular Macromolecule Localization	protein targeting	GO:0006605
Biological Process	Cellular Macromolecule Localization	intracellular protein transport	GO:0006886
Biological Process	Cellular Macromolecule Localization	protein localization to plasma membrane	GO:0072659
Biological Process	Cellular Macromolecule Localization	protein localization to cell periphery	GO:1990778
Biological Process	Cellular Macromolecule Localization	protein localization to Golgi apparatus	GO:0034067
Biological Process		establishment of localization in cell	GO:0051649
Biological Process	Intracellular Transport	endosomal transport	GO:0016197
Biological Process	Intracellular Transport	endosome transport via multivesicular body sorting pathway	GO:0032509
Biological Process	Intracellular Transport	late endosome to vacuole transport	GO:0045324
Biological Process	Intracellular Transport	late endosome to vacuole transport via multivesicular body sorting pathway	GO:0032511
Biological Process	Intracellular Transport	cytosolic transport	GO:0016482
Biological Process	Intracellular Transport	retrograde transport, endosome to Golgi	GO:0042147
Biological Process	Intracellular Transport	Golgi to vacuole transport	GO:0006896
Biological Process	intracellular transport	intracellular transport	GO:0046907				0.0433
Biological Process		process utilizing autophagic mechanism	GO:0061919
Biological Process		protein localization by the Cvt pathway	GO:0032258
Biological Process	Vesicle-mediated Transport	vacuolar transport	GO:0007034
Biological Process	Vesicle-mediated Transport	vesicle-mediated transport	GO:0016192
Biological Process	Vesicle-mediated Transport	multivesicular body sorting pathway	GO:0071985
Biological Process	Vesicle-mediated Transport	Golgi vesicle transport	GO:0048193
Biological Process	Vesicle-mediated Transport	intra-Golgi vesicle-mediated transport	GO:0006891
Biological Process	Vesicle-mediated Transport	post-Golgi vesicle-mediated transport	GO:0006892
Biological Process	Vesicle-mediated Transport	Golgi to plasma membrane transport	GO:0006893
Biological Process	Vesicle-mediated Transport	endocytosis	GO:0006897
Biological Process	Vesicle-mediated Transport	vesicle-mediated transport to the plasma membrane	GO:0098876
Biological Process	Vesicle-mediated Transport	vesicle fusion	GO:0006906
Biological Process	Vesicle-mediated Transport	vesicle docking	GO:0048278
Biological Process	Vesicle-mediated Transport	vesicle budding from membrane	GO:0006900
Biological Process	Transport	transport	GO:0006810
Biological Process	Transport	ATP export	GO:1904669
Biological Process	Transport	ATP transport	GO:0015867
Biological Process	Transport	peptide transport	GO:0015833
Biological Process	Transport	purine ribonucleotide transport	GO:0015868
Biological Process	Transport	adenine nucleotide transport	GO:0051503
Biological Process	Transport	amide transport	GO:0042886
Biological Process	Transport	purine nucleotide transport	GO:0015865
Biological Process	Transport	nucleotide transport	GO:0006862
Biological Process	Transport	carbohydrate derivative transport	GO:1901264
Biological Process	Transport	organophosphate ester transport	GO:0015748
Biological Process	Transport	nitrogen compound transport	GO:0071705
Biological Process	Transport	organic substance transport	GO:0071702
Biological Process	Transport	import into cell	GO:0098657
Biological Process	Transport	secretion	GO:0046903
Biological Process	Transport	anion transport	GO:0006820
Biological Process	Transport	organic anion transport	GO:0015711
Biological Process	Transport	nucleobase-containing compound transport	GO:0015931
Biological Process		localization	GO:0051179
Biological Process		establishment of localization	GO:0051234
Biological Process	Establishment of Protein Localization	protein targeting to vacuole	GO:0006623
Biological Process	Establishment of Protein Localization	establishment of protein localization to vacuole	GO:0072666
Biological Process	Establishment of Protein Localization	establishment of protein localization to organelle	GO:0072594
Biological Process	Establishment of Protein Localization	Golgi to plasma membrane protein transport	GO:0043001
Biological Process	Establishment of Protein Localization	establishment of protein localization to plasma membrane	GO:0061951
Biological Process	Establishment of Protein Localization	establishment of protein localization to membrane	GO:0090150
Biological Process	Establishment of Protein Localization	protein transport	GO:0015031
Biological Process	Establishment of Protein Localization	establishment of protein localization	GO:0045184
Biological Process	Macromolecule Localization	protein localization	GO:0008104
Biological Process	Macromolecule Localization	macromolecule localization	GO:0033036
Biological Process	Cellular Metabolic Process	negative regulation of cellular metabolic process	GO:0031324
Biological Process	Cellular Metabolic Process	sphingolipid metabolic process	GO:0006665
Biological Process	Cellular Metabolic Process	membrane lipid metabolic process	GO:0006643
Biological Process	Cellular Metabolic Process	cellular lipid metabolic process	GO:0044255
Biological Process	Cellular Metabolic Process	nucleobase-containing small molecule metabolic process	GO:0055086
Biological Process	Cellular Metabolic Process	nucleoside phosphate metabolic process	GO:0006753
Biological Process		negative regulation of metabolic process	GO:0009892
Biological Process		negative regulation of nitrogen compound metabolic process	GO:0051172
Biological Process		organonitrogen compound metabolic process	GO:1901564
Biological Process		nitrogen compound metabolic process	GO:0006807
Biological Process	Organic Substance Metabolic Process	glycosphingolipid metabolic process	GO:0006687
Biological Process	Organic Substance Metabolic Process	protein glycosylation	GO:0006486
Biological Process	Organic Substance Metabolic Process	protein N-linked glycosylation	GO:0006487	0.0091
Biological Process	Organic Substance Metabolic Process	carbohydrate derivative biosynthetic process	GO:1901137	0.00354			0.0866
Biological Process	Organic Substance Metabolic Process	wybutosine metabolic process	GO:0031590
Biological Process	Organic Substance Metabolic Process	wybutosine biosynthetic process	GO:0031591
Biological Process	ORganic Substance Metabolic Process	oligosaccharide-lipid intermediate biosynthetic process	GO:0006490
Biological Process	Organic Substance Metabolic Process	glycolipid biosynthetic process	GO:0009247
Biological Process	Organic Substance Metabolic Process	glycosphingolipid biosynthetic process	GO:0006688
Biological Process	ORganic Substance Metabolic Process	glycolipid metabolic process	GO:0006664
Biological Process	ORganic Substance Metabolic Process	liposaccharide metabolic process	GO:1903509
Biological Process	Organic Substance Metabolic Process	lipid biosynthetic process	GO:0008610
Biological Process	Organic Substance Metabolic Process	negative regulation of macromolecule metabolic process	GO:0010605
Biological Process	Organic Substance Metabolic Process	proteolysis	GO:0006508
Biological Process	Organic Substance Metabolic Process	negative regulation of macromolecule biosynthetic process	GO:0010558
Biological Process	Organic Substance Metabolic Process	regulation of nucleic acid-templated transcription	GO:1903506
Biological Process	Organic Substance Metabolic Process	regulation of RNA metabolic process	GO:0051252
Biological Process	Organic Substance Metabolic Process	negative regulation of RNA metabolic process	GO:0051253
Biological Process	Organic Substance Metabolic Process	protein metabolic process	GO:0019538
Biological Process	Organic Substance Metabolic Process	cytoplasmic translation	GO:0002181
Biological Process	Organic Substance Metabolic Process	lipid metabolic process	GO:0006629
Biological Process	Biosynthetic Process	negative regulation of biosynthetic process	GO:0009890
Biological Process	Biosynthetic Process	negative regulation of cellular biosynthetic process	GO:0031327
Biological Process	Biosynthetic Process	negative regulation of RNA biosynthetic process	GO:1902679
Biological Process	Biosynthetic Process	negative regulation of nucleic acid-templated transcription	GO:1903507
Biological Process	Biosynthetic Process	regulation of RNA biosynthetic process	GO:2001141
Biological Process	Biosynthetic Process	negative regulation of cellular macromolecule biosynthetic process	GO:2000113
Biological Process	Biosynthetic Process	regulation of transcription, DNA-templated	GO:0006355
Biological Process	Biosynthetic Process	sphingolipid biosynthetic process	GO:0030148
Biological Process	Biosynthetic Process	membrane lipid biosynthetic process	GO:0046467
Biological Process	Biosynthetic Process	negative regulation of transcription from RNA polymerase II promoter by glucose	GO:0061987
Biological Process	Biosynthetic Process	negative regulation of transcription by glucose	GO:0061986
Biological Process	Catabolic Process	ubiquitin-dependent protein catabolic process via the multivesicular body sorting pathway	GO:0043162
Biological Process	Catabolic Process	autophagy	GO:0006914
Biological Process	Catabolic Process	ubiquitin-dependent protein catabolic process	GO:0006511
Biological Process	Catabolic Process	modification-dependent protein catabolic process	GO:0019941
Biological Process	Catabolic Process	protein transport to vacuole involved in ubiquitin-dependent protein catabolic process via the multivesicular body sorting pathway	GO:0043328
Biological Process	Catabolic Process	modification-dependent macromolecule catabolic process	GO:0043632
Biological Process	Catabolic Process	proteolysis involved in cellular protein catabolic process	GO:0051603
Biological Process	Catabolic Process	cellular catabolic process	GO:0044248
Biological Process	Catabolic Process	catabolic process	GO:0009056
Biological Process	Catabolic Process	macroautophagy	GO:0016236
Biological Process	Catabolic Process	selective autophagy	GO:0061912
Biological Process	Catabolic Process	cellular macromolecule catabolic process	GO:0044265
Biological Process		macromolecule glycosylation	GO:0043413
Biological Process		glycosylation	GO:0070085	0.00607
Biological Process		NAD metabolic process	GO:0019674	0.00614
Biological Process	Response to Stimulus	drug export	GO:0046618
Biological Process	Response to Stimulus	response to pH	GO:0009268
Biological Process	Response to Stimulus	drug transport	GO:0015893
Biological Process		negative regulation of biological process	GO:0048519
Molecular Function	Binding	phosphoprotein binding	GO:0051219
Molecular Function	Binding	protein binding	GO:0005515
Molecular Function	Binding	SNARE binding	GO:0000149
Molecular Function	Binding	phospholipid binding	GO:0005543
Molecular Function	Catalytic Activity	dolichyl pyrophosphate Glc1Man9GlcNAc2 alpha-1,3-glucosyltransferase activity	GO:0042283
Molecular Function	Catalytic Activity	transferase activity, transferring hexosyl groups	GO:0016758
Molecular Function		SNAP receptor activity	GO:0005484
Molecular Function		transcription coregulator activity	GO:0003712
Molecular Function		structural constituent of ribosome	GO:0003735
Cellular Component		cytoplasmic side of plasma membrane	GO:0009898
Cellular Component		endomembrane system	GO:0012505
Cellular Component	Endosome	ESCRT complex	GO:0036452
Cellular Component	Endosome	endosome membrane	GO:0010008
Cellular Component	Endosome	endosome	GO:0005768
Cellular Component	Endosome	ESCRT II complex	GO:0000814
Cellular Component	Endosome	multivesicular body	GO:0005771
Cellular Component	Endosome	ESCRT I complex	GO:0000813
Cellular Component	Endosome	late endosome membrane	GO:0031902
Cellular Component	Endosome	ESCRT III complex	GO:0000815
Cellular Component	Endosome	late endosome	GO:0005770
Cellular Component		endoplasmic reticulum membrane	GO:0005789
Cellular Component	Membrane	membrane	GO:0016020
Cellular Component	Membrane	membrane protein complex	GO:0098796
Cellular Component	Membrane	whole membrane	GO:0098805
Cellular Component	Membrane	cytoplasmic side of membrane	GO:0098562
Cellular Component	Membrane	side of membrane	GO:0098552
Cellular Component	Membrane	AP-type membrane coat adaptor complex	GO:0030119
Cellular Component	Membrane	AP-3 adaptor complex	GO:0030123				0.000997
Cellular Component	Membrane	membrane coat	GO:0030117				0.000637
Cellular Component	Organelle	organelle	GO:0043226				0.0406
Cellular Component	Organelle	bounding membrane of organelle	GO:0098588
Cellular Component	Organelle	vesicle	GO:0031982
Cellular Component	Organelle	organelle membrane	GO:0031090
Cellular Component	Organelle	vesicle membrane	GO:0012506
Cellular Component	Intracellular Organelle	intracellular vesicle	GO:0097708				0.0127
Cellular Component	Intracellular Organelle	organelle subcompartment	GO:0031984
Cellular Component	Intracellular Organelle	SAGA-type complex	GO:0070461
Cellular Component	Intracellular Organelle	ribosome	GO:0005840
Cellular Component	Intracellular Organelle	ribosomal subunit	GO:0044391
Cellular Component	Intracellular Organelle	intracellular membrane-bounded organelle	GO:0043231
Cellular Component	Cytoplasm	cytoplasmic vesicle	GO:0031410
Cellular Component	Cytoplasm	Golgi transport complex	GO:0017119
Cellular Component	Cytoplasm	Golgi membrane	GO:0000139
Cellular Component	Cytoplasm	Golgi apparatus	GO:0005794
Cellular Component	Cytoplasm	SNARE complex	GO:0031201
Cellular Component	Cytoplasm	Golgi subcompartment	GO:0098791
Cellular Component	Cytoplasm	cytosol	GO:0005829
Cellular Component	Cytoplasm	trans-Golgi network	GO:0005802
Cellular Component	Cytoplasm	cytosolic small ribosomal subunit	GO:0022627
Cellular Component	Cytoplasm	endoplasmic reticulum	GO:0005783
Cellular Component	Cytoplasm	cytoplasmic vesicle membrane	GO:0030659
Cellular Component		intracellular organelle	GO:0043229				0.00951
Cellular Component	Protein-containing Complex	protein-containing complex	GO:0032991
Cellular Component	Protein-containing Complex	tethering complex	GO:0099023
Cellular Component	Protein-containing Complex	SAGA complex	GO:0000124
Cellular Component	Protein-containing Complex	Cdc50p-Drs2p complex	GO:1990530
Cellular Component	Protein-containing Complex	90S preribosome	GO:0030686

## Sheet: Dataset S3a
Dataset S3a. List of gene products considered to calculate sensitive network.
ORF	Standard.name
YPL057C	SUR1
YJL004C	SYS1
YNL051W	COG5
YPL056C	LCL1
YNL041C	COG6
YJL134W	LCB3
YMR183C	SSO2
YDR136C	VPS61
YML071C	COG8
YBR036C	CSG2
YCR034W	FEN1
YDR389W	SAC7
YDR392W	SPT3
YHR136C	SPL2
YJL135W
YLR025W	SNF7
YLR262C	YPT6
YPL065W	VPS28
YBR164C	ARL1
YCL008C	STP22
YDL052C	SLC1
YDR024W	FYV1
YDR455C
YDR540C	IRC4
YGL046W
YGL226C-A	OST5
YIL095W	PRK1
YIL105C	SLM1
YJL020C	BBC1
YJL021C
YJR102C	VPS25
YKR019C	IRS4
YLR171W
YLR180W	SAM1
YLR417W	VPS36
YNL229C	URE2
YOR061W	CKA2
YOR067C	ALG8
YPL002C	SNF8
YPL079W	RPL21B
YMR077C	VPS20
YCR081W	SRB8
YDL023C
YDR049W	VMS1
YDR073W	SNF11
YDR297W	SUR2
YDR486C	VPS60
YER122C	GLO3
YGL045W	RIM8
YGR155W	CYS4
YIL065C	FIS1
YIL077C
YIL124W	AYR1
YJR040W	GEF1
YKR020W	VPS51
YLR055C	SPT8
YLR170C	APS1
YMR154C	RIM13
YOR043W	WHI2
YOR267C	HRK1
YOR275C	RIM20
YDR162C	NBP2
YGL005C	COG7

## Sheet: Dataset S3b
Dataset S3b. List of gene products considered to calculate resistant network.
ORF	Standard.name
YGL226C-A	OST5
YLR171W
YOR067C	ALG8
YLR170C	APS1
YBL065W
YCL006C
YDR218C	SPR28
YDR256C	CTA1
YDR272W	GLO2
YGR193C	PDX1
YGR196C	FYV8
YGR261C	APL6
YHR198C	AIM18
YJL139C	YUR1
YJR066W	TOR1
YML021C	UNG1
YMR214W	SCJ1
YMR304W	UBP15
YOL084W	PHM7
YPL191C
YPR096C
YAL058W	CNE1
YBL049W	MOH1
YDR018C
YHR094C	HXT1
YIL157C	COA1
YLR169W
YMR262W
YOR112W	CEX1
YOR277C
